# Supplementary material for: Salicylate induces AMPK and inhibits c-MYC to activate a NRF2/ARE/miR-34a/b/c cascade resulting in suppression of colorectal cancer metastasis
Source: PubMed Central journal article supplement (PMC10613307; doi:10.1038/s41419-023-06226-9), 2023-10-28
Supplement: 41419_2023_6226_MOESM3_ESM.pdf [file 41419_2023_6226_MOESM3_ESM.pdf]

## Supplementary material

# Salicylate induces AMPK and inhibits c-MYC to activate a NRF2/ARE/miR-34a/b/c cascade resulting in suppression of colorectal cancer metastasis

Chunfeng Liu, Matjaz Rokavec, Zekai Huang and Heiko Hermeking

### Inventory of Supplementary Information:

- **Supplementary Figure 1**  
Related to Figure 1  
Salicylate inhibits cell viability and induces apoptosis in CRC cells
- **Supplementary Figure 2**  
Related to Figure 2  
Effects of salicylate on migration, invasion and MET in CRC cells
- **Supplementary Figure 3**  
Related to Figure 3  
Salicylate up-regulates *pri-miR-34a/b/c* and mature miR-34a independent of p53
- **Supplementary Figure 4**  
Related to Figure 4  
miR-34a and miR-34-b/c mediate the effects of salicylate in CRC cells
- **Supplementary Figure 5**  
Related to Figure 5  
Salicylate inhibits migration and invasion of SW620-*Luc2* cells in a miR-34a-dependent manner
- **Supplementary Figure 6**  
Related to Figure 6  
Salicylate inhibits migration and invasion in a NRF2-dependent manner
- **Supplementary Figure 7**  
Related to Figure 7  
Salicylate activates NRF2 via AMPK in CRC cells
- **Supplementary Figure 8**  
Related to Figure 8  
Suppression of c-MYC by salicylate is required for NRF2-mediated induction of *miR-34a/b/c*

- **Supplementary Table 1**

Oligonucleotides used for qPCR

- **Supplementary Table 2**

Oligonucleotides used for qChIP

- **Supplementary Table 3**

List of antibodies

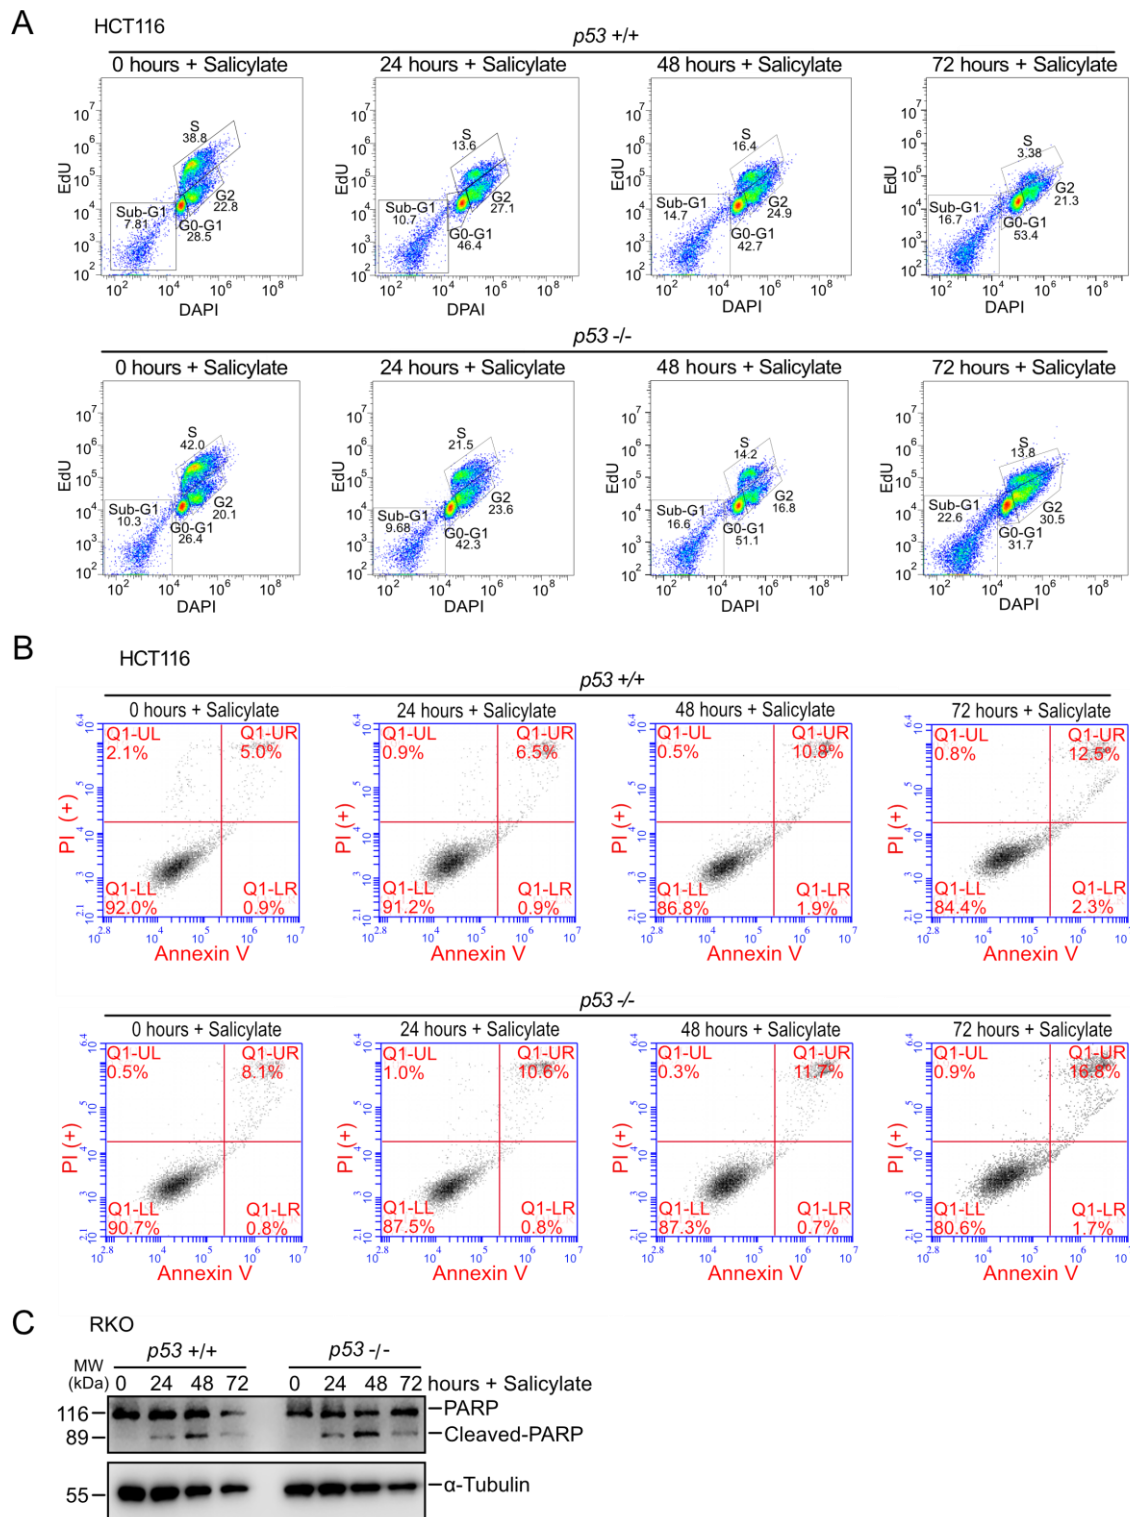

**Figure S1: Salicylate inhibits cell viability and induces apoptosis in CRC cells**

A. Cell cycle analysis by flow cytometry after staining of HCT116 cells with EdU. B. HCT116 cells were treated with 5 mM salicylate at the indicated time points and apoptotic cells were detected by Annexin V-FITC/PI staining. C. Detection of cleaved PARP/PARP protein after treatment salicylate at the indicated time-points in RKO cells by Western blot analysis.

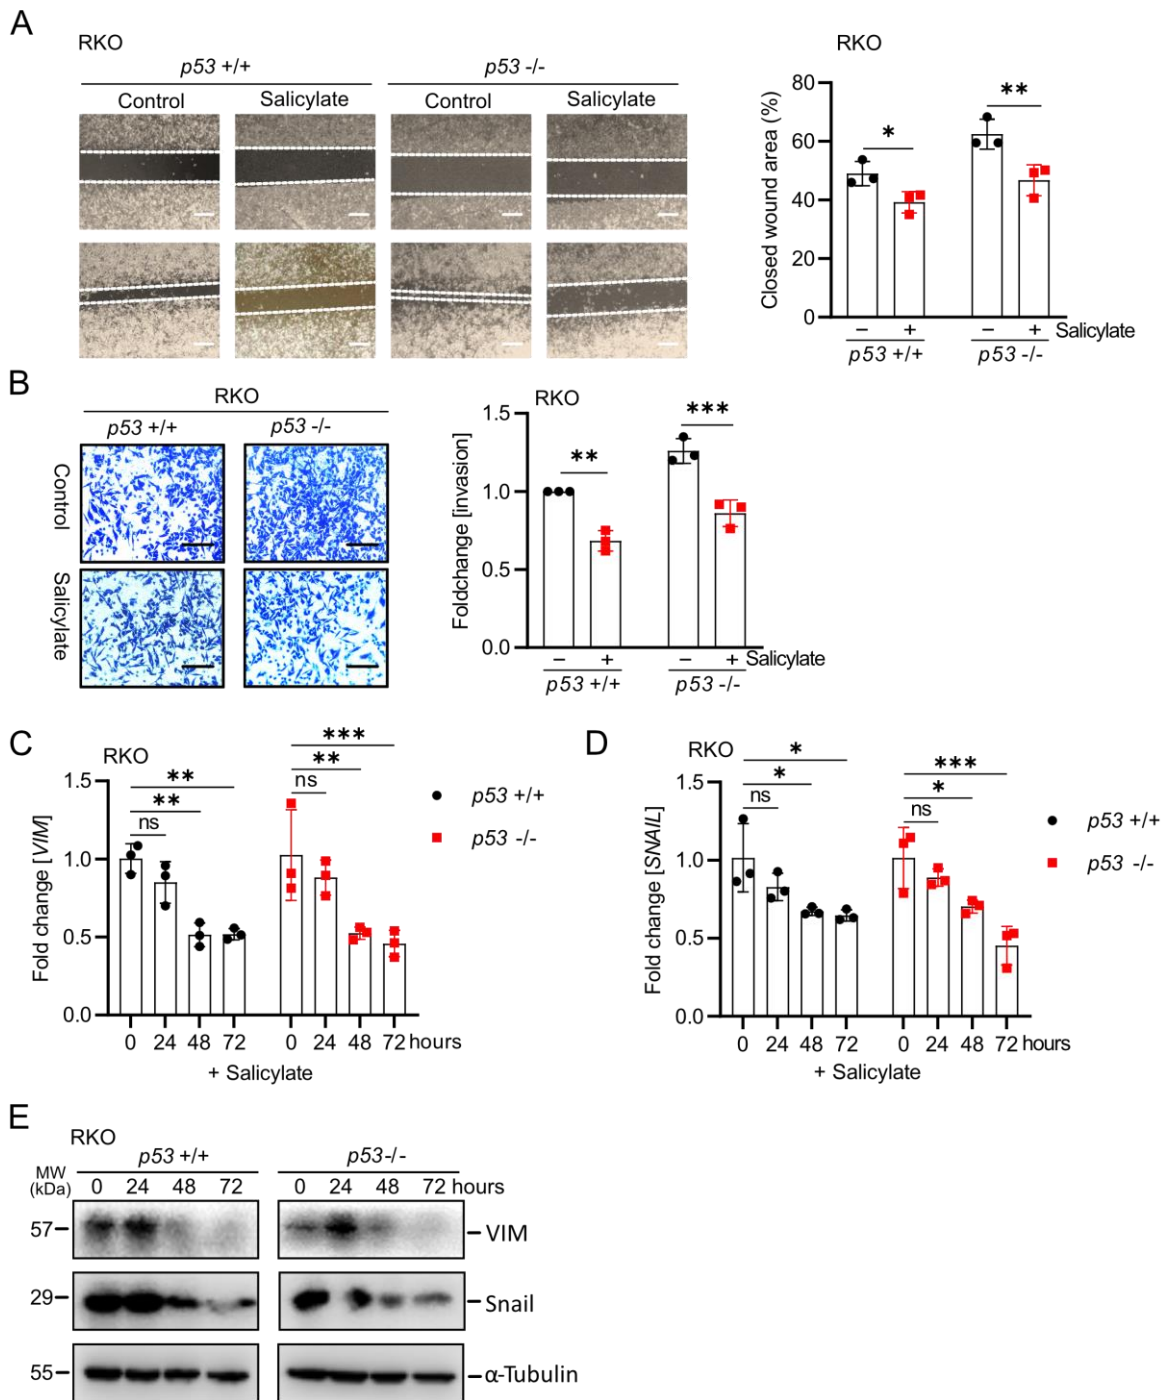

### Figure S2: Effects of salicylate on migration, invasion and MET in CRC cells

A. Wound healing assay: the scratch width was determined 24 hours after the indicated treatment of RKO cells (left panel). Results represent the mean (%) of wound closure (right panel). Scale bars: 200  $\mu$ m. B. Invasion was determined in a modified Boyden-chamber assay 48 hours after the indicated treatments of RKO cells (left panel). Fold changes in invasion were calculated by normalizing them to the corresponding control group (right panel). Scale bars: 100  $\mu$ m. C-E. Analysis of mRNA and protein levels of MET markers 48 hours after the indicated treatments. In panels (A-D) the mean  $\pm$  SD (n=3) is provided. \* P < 0.05, \*\* P < 0.01, \*\*\* P < 0.001, and ns = not significant.

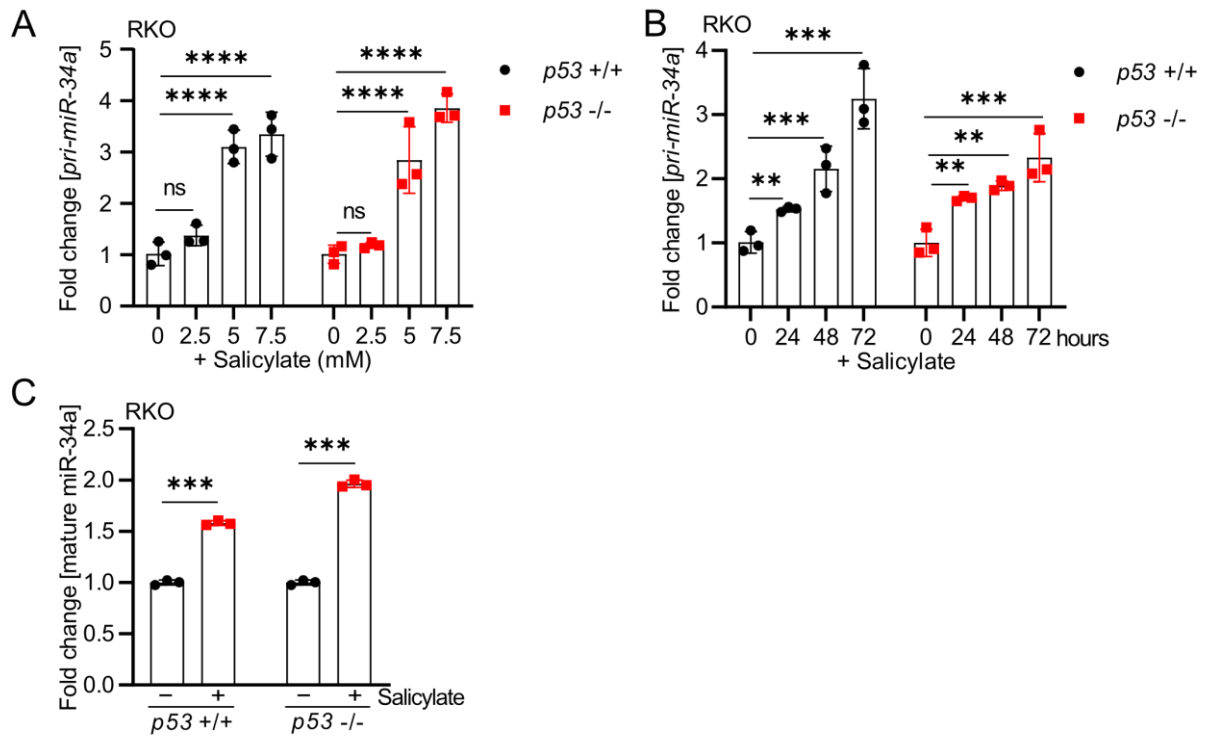

**Figure S3: Salicylate up-regulates *pri-miR-34a/b/c* and mature *miR-34a* independent of *p53***

A-C. The expression of *pri-miR-34a* (A), *pri-miR-34b/c* (B), and mature *miR-34a* (C) after treatment of the indicated cells with salicylate for the indicated periods. In panel (A-C) the mean  $\pm$  SD (n=3) is provided. \*\* P < 0.01, \*\*\* P < 0.001, \*\*\*\* P < 0.0001, ns = not significant.

A

HCT116

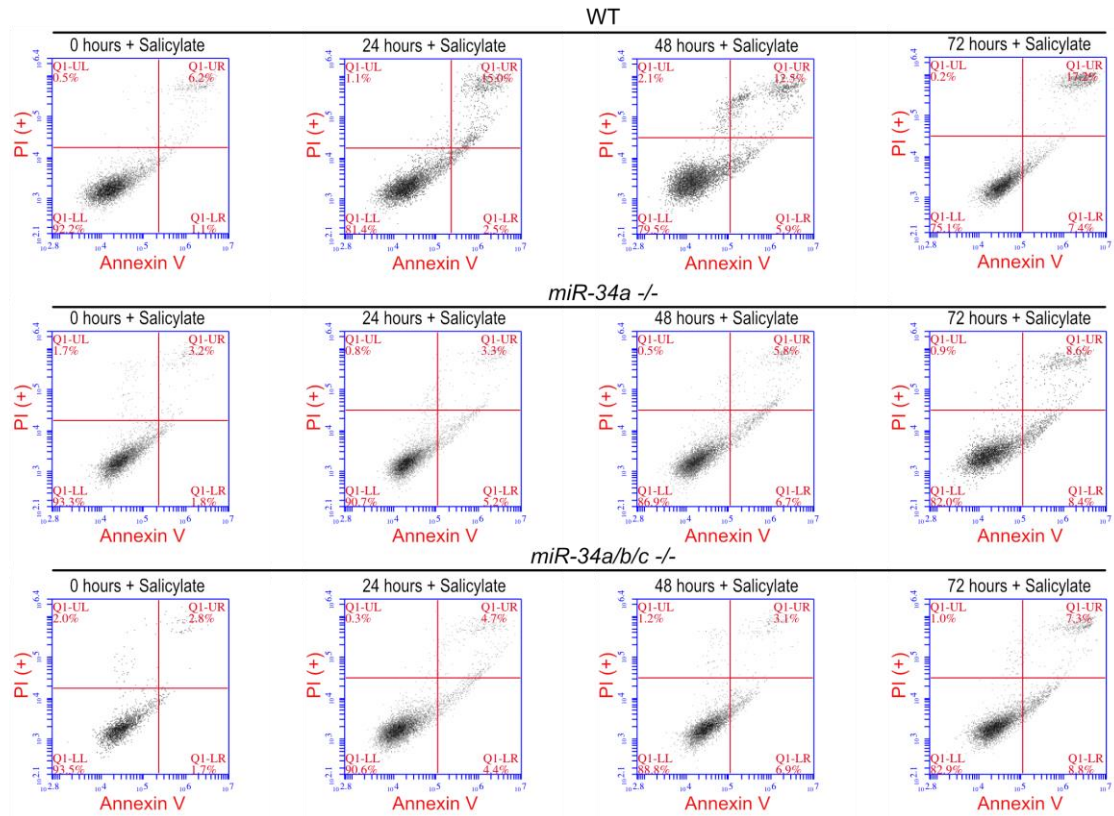

B

HCT116

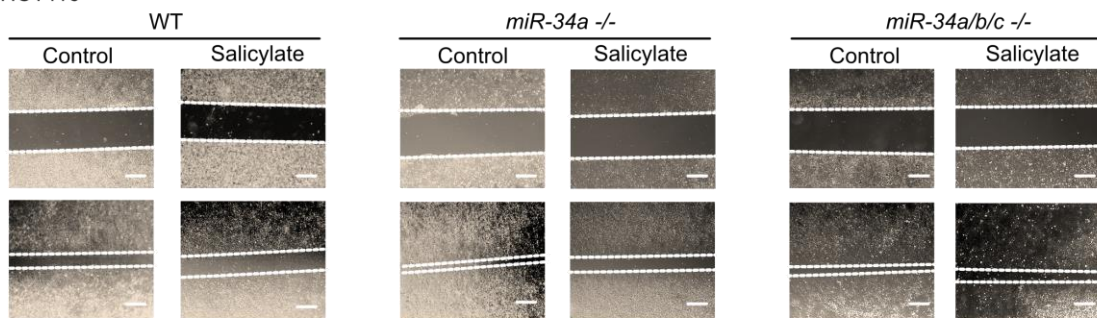

C

HCT116

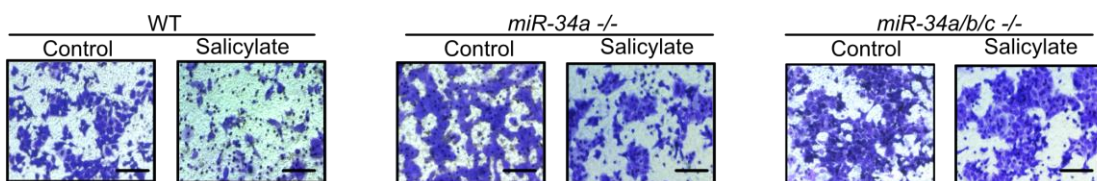

**Figure S4: *miR-34a* and *miR-34b/c* mediate the effects of salicylate in CRC cells**  
 A. Flow cytometric detection of Annexin V-FITC and PI staining after treatment of indicated cells with salicylate for indicated time points. B. Wound healing assay of indicated cells after treatment with salicylate for 24 hours. Scale bars: 200  $\mu\text{m}$ . C. Modified Boyden-chamber assay for determination of invasion of indicated cells after treatment with salicylate for 48 hours. Scale bars: 100  $\mu\text{m}$ .

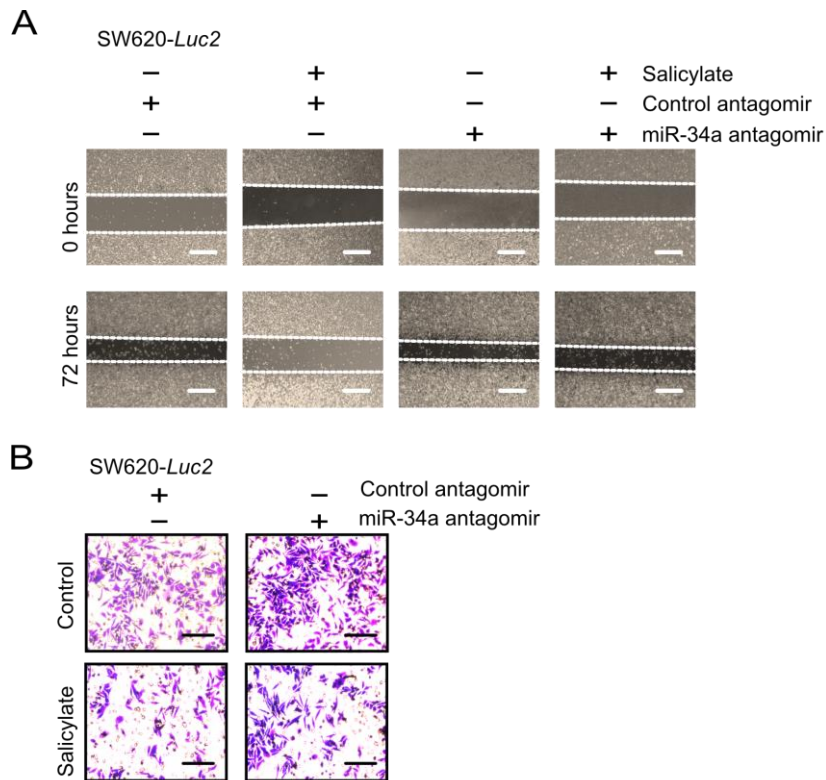

**Figure S5: Salicylate inhibits migration and invasion of SW620-*Luc2* cells in a miR-34a-dependent manner**

A. Wound healing assay of indicated cells after treatment with salicylate for 72 hours. Scale bars: 200  $\mu$ m. B. Invasion was determined in a modified Boyden-chamber assay. The indicated cells were treated with salicylate for 48 hours. Scale bars: 100  $\mu$ m.

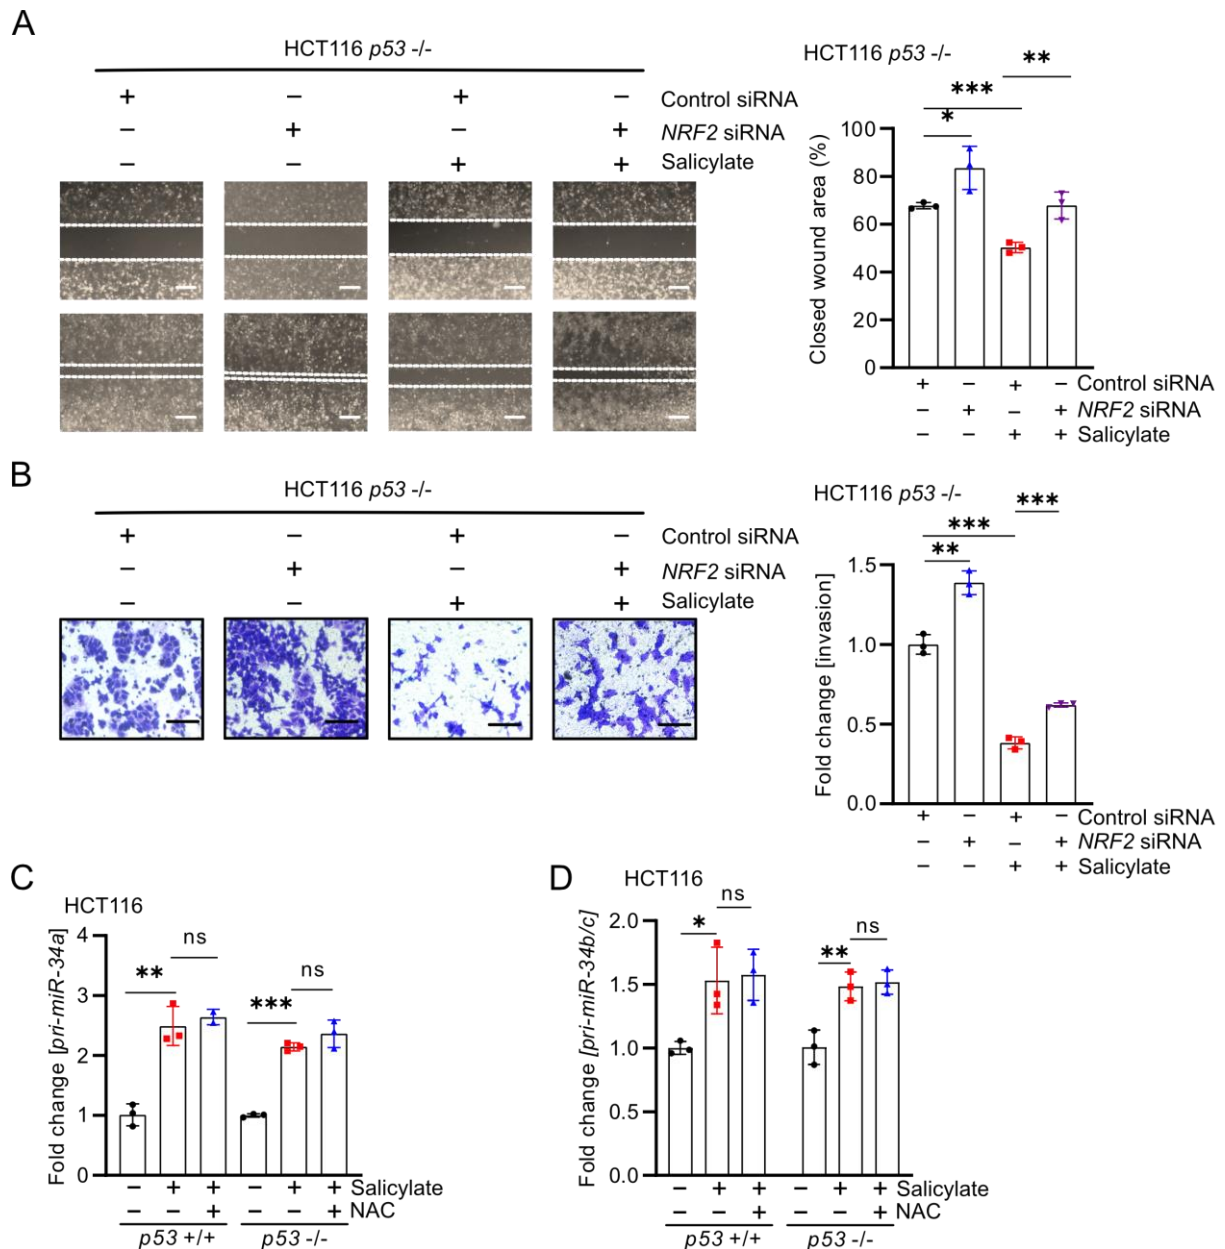

**Figure S6: Salicylate inhibits migration and invasion in a NRF2-dependent manner**

A. Wound healing assay of HCT116 *p53*<sup>-/-</sup> cells 24 hours after the indicated treatments (left panel). Scale bars: 200  $\mu$ m. Results represent the mean (%) of wound closure (right panel). B. Determination of invasion in a modified Boyden-chamber assay of HCT116 *p53*<sup>-/-</sup> cells 48 hours after the indicated treatments. Scale bars: 100  $\mu$ m. Fold changes in invasive cells were calculated by normalizing them to the corresponding control group (right panel). C-D. qPCR analysis of *pri-miR-34a* (C) and *pri-miR-34b/c* (D) in HCT116 cells for 48 hours after treatment with salicylate and/or NAC. In panels A-D the mean  $\pm$  SD (n=3) is provided. \* P < 0.05, \*\* P < 0.01, and \*\*\* P < 0.001.



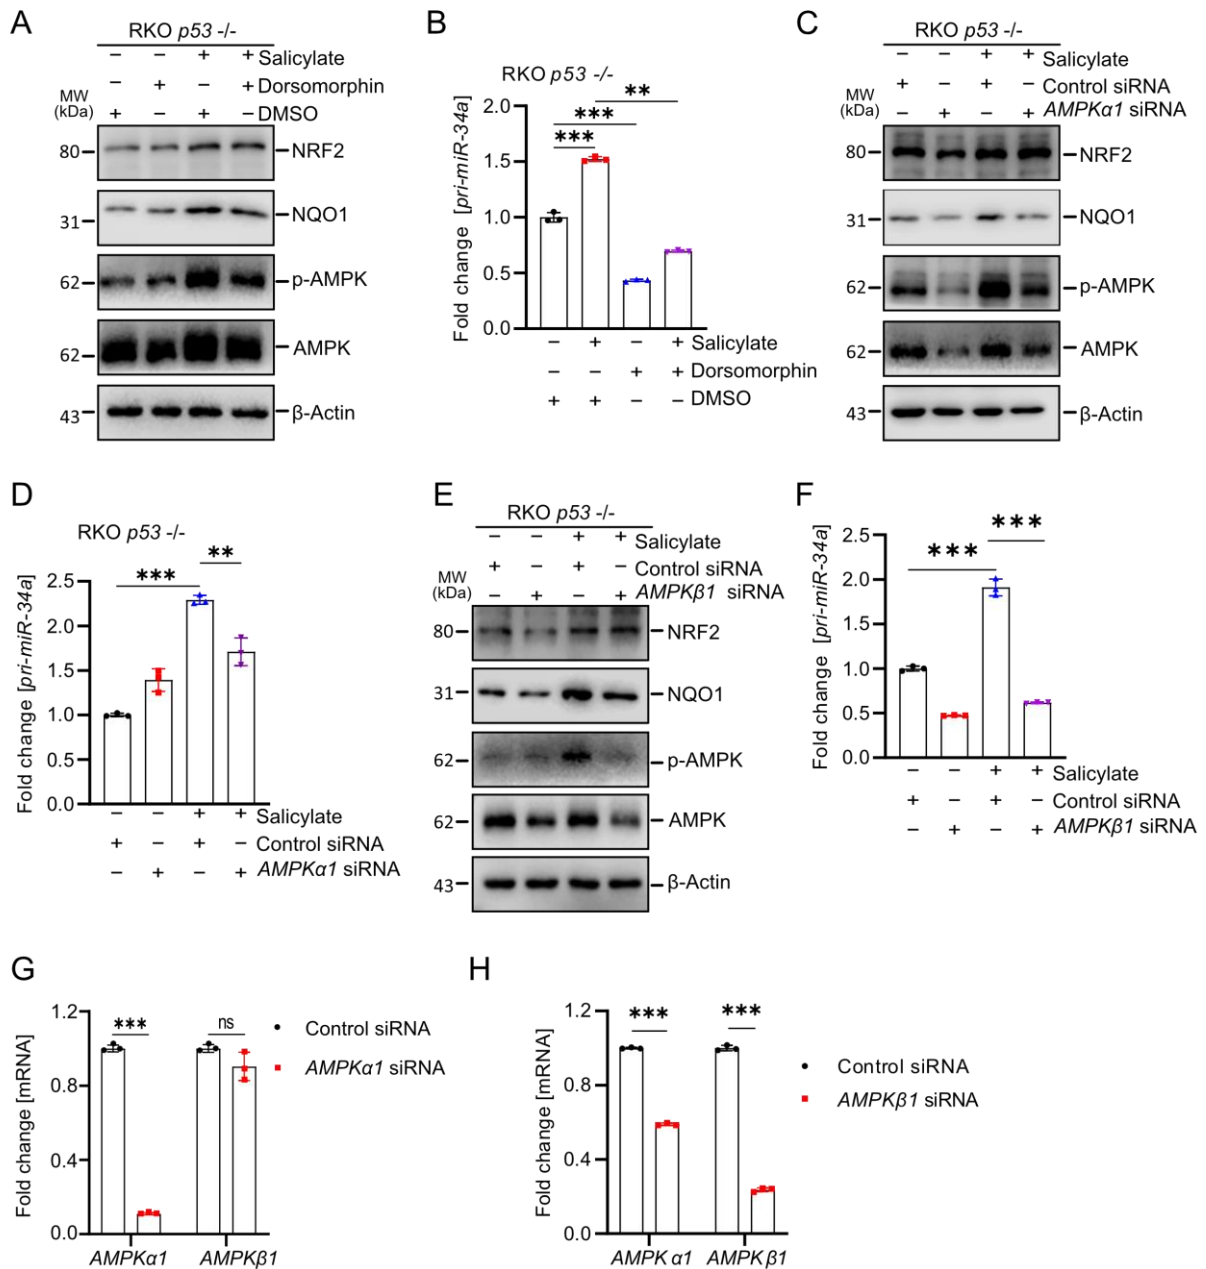

### Figure S7: Salicylate activates NRF2 via AMPK in CRC cells

A. Detection of the indicated proteins by Western blot analysis 48 hours after the indicated treatments of RKO *p53*<sup>-/-</sup> cells. B. qPCR analysis of *pri-miR-34a* 24 hours after the indicated treatments. C. Western blot analysis of the indicated proteins 24 hours after the indicated treatments. D. qPCR analysis of *pri-miR-34a* 24 hours after the indicated treatments. E. Western blot analysis of the indicated proteins 24 hours after the indicated treatment with siRNA pools. F. qPCR analysis of *pri-miR-34a* 24 hours after the indicated treatments. G and H. qPCR analysis of *AMPKα1* and *AMPKβ1* 48 hours after the indicated transfection with siRNA pools. In panels B, D, F, G, and H mean values ± SD (n=3) are provided. \*\* P < 0.01, \*\*\* P < 0.001, and ns = not significant.

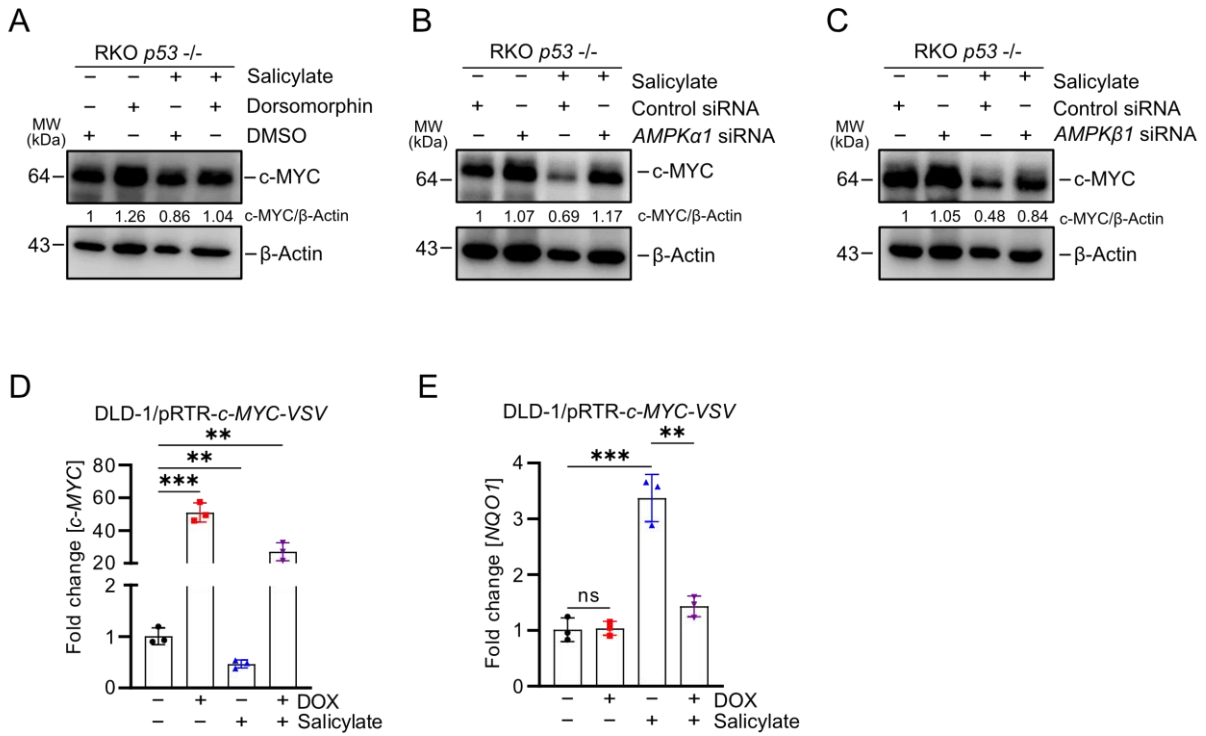

**Figure S8: Suppression of c-MYC by salicylate is required for NRF2-mediated induction of *miR-34a/b/c***

A. Detection of the indicated proteins by Western blot analysis after the indicated treatments of RKO *p53*<sup>-/-</sup> cells. B. Western blot analysis of the indicated proteins after the indicated treatments/transfections with siRNA pools. C. Western blot analysis of the indicated proteins after the indicated treatments/transfections with siRNA pools. D-E. qPCR analyses of *c-MYC* (D) and *NQO1* (E) expression in DLD-1 *pRTR-c-MYC*-VSV cells treated with salicylate or/and DOX (*c-MYC* on) for 48 hours.

**A.**  
**Supplemental Tables**

**Supplemental Table S1. Oligonucleotides used for qPCR**

| <b>gene</b>                     | <b>forward (5' – 3')</b>   | <b>reverse (5' – 3')</b>   |
|---------------------------------|----------------------------|----------------------------|
| <i>GAPDH</i>                    | TGTTGCCATCAATGACCCCTT      | CTCCACGACGTACTIONCAGCG     |
| <i>ACTIN</i>                    | TGACATTAAGGAGAAGCTGTGCTAC  | GAGTTGAAGGTAGTTTCGTGGATG   |
| <i>NQO1</i>                     | TGGTCCCGTTTTGGCTATTCT      | GAGACATGCTCCGTGGAGAC       |
| <i>NRF2</i>                     | GCAAATGAGGTTTCTTCGGC       | GGTCTTCTGTGGAGAGGATG       |
| <i>Pri-miR34a</i>               | CGTCACCTCTTAGGCTTGGA       | CATTGGTGTGCTTGTGCTCT       |
| <i>Pri-miR34bc</i>              | GCTCGGTTTTGTAGGCAGTGC      | GATGGCAGTGGAGTTAGTGA       |
| <i>CDH1</i>                     | CCCGGGACAACGTTTATTAC       | GCTGGCTCAAGTCAAAGTCC       |
| <i>VIM</i>                      | TACAGGAAGCTGCTGGAAGG       | ACCAGAGGGAGTGAATCCAG       |
| <i>SLUG</i>                     | GGGAGAAGCCTTTTTCTTG        | TCCTCATGTTTGTGCAGGAG       |
| <i>SNAIL</i>                    | GCACATCCGAAGCCACAC         | GGAGAAGGTCCGAGCACAC        |
| <i>AMPK<math>\alpha</math>1</i> | GGA GCC TTG ATG TGG TAG GA | TTT CAT CCA GCC TTC CAT TC |
| <i>AMPK<math>\beta</math>1</i>  | AAA AGT GCT CCG ACG TGT CT | ATG CCC GTG TCC TTG TTT AG |
| mature miR-34a                  | MS00003318 (QIAGEN)        |                            |
| mature miR-34b                  | MS00031780 (QIAGEN)        |                            |
| mature miR-34c                  | MS00003332 (QIAGEN)        |                            |

**Supplemental Table S2. Oligonucleotides used for qChIP**

| gene                    | forward (5' – 3')         | reverse (5' – 3')        |
|-------------------------|---------------------------|--------------------------|
| <i>MiR-34a</i><br>(A)   | GGACTCCCGCAAATCTCCA       | CACGAGCAGGAAGGAGGAC      |
| <i>MiR-34a</i><br>(B)   | TTACCCCTGGGACCGAGAGA      | AGAATCTGTTGCGATGAAATCACT |
| <i>MiR-34a</i><br>(C)   | TGTCTCAGAACGAGACAGTGG     | CCGACTTCGTCCTCTTAGTGA    |
| <i>MiR-34b/c</i><br>(D) | TGTTGTCTCCAATTGTCTCCA     | AGATCGTGCCACTGCACTC      |
| <i>NQO1</i>             | ATTCGTCTCCACGGAGCAT       | CATGCCCTTTTAGCCTTGG      |
| <i>16q22</i>            | CTACTCACTTATCCATCCAGGCTAC | ATTCACACACTCAGACATCACAG  |

### Supplemental Table S3. List of antibodies

#### Primary antibodies

| epitope                   | catalog no. | company                   | use        | dilution       | source |
|---------------------------|-------------|---------------------------|------------|----------------|--------|
| PARP                      | # 9532      | Cell Signaling Technology | WB         | 1:1000         | rabbit |
| NRF2                      | # ab92946   | Abcam                     | WB         | 1:1000         | rabbit |
| $\alpha$ -Tubulin         | # T-9026    | Sigma-Aldrich             | WB         | 1:1000         | mouse  |
| $\beta$ -Actin            | # 4967      | Cell Signaling Technology | WB         | 1:1000         | rabbit |
| H3                        | # 9715      | Cell Signaling Technology | WB         | 1:1000         | rabbit |
| NQO1                      | # sc-32793  | Santa Cruz                | WB         | 1:1000         | mouse  |
| NRF2                      | # 12721     | Cell Signaling Technology | ChIP<br>IF | 1:200<br>1:400 | rabbit |
| p- AMPK $\alpha$ (Thr172) | # 2535      | Cell Signaling Technology | WB         | 1:1000         | rabbit |
| AMPK $\alpha$             | #5831       | Cell Signaling Technology | WB         | 1:1000         | rabbit |
| E-cadherin                | # sc-8426   | Santa Cruz                | WB         | 1:1000         | mouse  |
| Vimentin (VIM)            | #3932       | Cell Signaling Technology | WB         | 1:500          | rabbit |
| Snail                     | #3879       | Cell Signaling Technology | WB         | 1:500          | rabbit |
| c-MYC                     | #sc-40      | Santa Cruz                | WB         | 1:1000         | mouse  |
| Rabbit IgG                |             | Sigma-Aldrich             | ChIP       |                | rabbit |

#### Secondary antibodies or conjugates

| name            | catalog no. | company       | use | dilution | source |
|-----------------|-------------|---------------|-----|----------|--------|
| anti-mouse HRP  | # W4021     | Promega       | WB  | 1:10.000 | goat   |
| anti-rabbit HRP | # A0545     | Sigma-Aldrich | WB  | 1:10.000 | goat   |
| Cy3             | ab6939      | Abcam         | IF  | 1:2000   | goat   |
